# Supplementary material for: Acute nutritional stress during pregnancy affects placental efficiency, fetal growth and adult glucose homeostasis
Source: PubMed Central journal article supplement (PMC5752535; doi:10.18632/oncotarget.22695), 2017-11-25
Supplement: oncotarget-08-109478-s001.pdf [file oncotarget-08-109478-s001.pdf]

# Acute nutritional stress during pregnancy affects placental efficiency, fetal growth and adult glucose homeostasis

## SUPPLEMENTARY MATERIALS

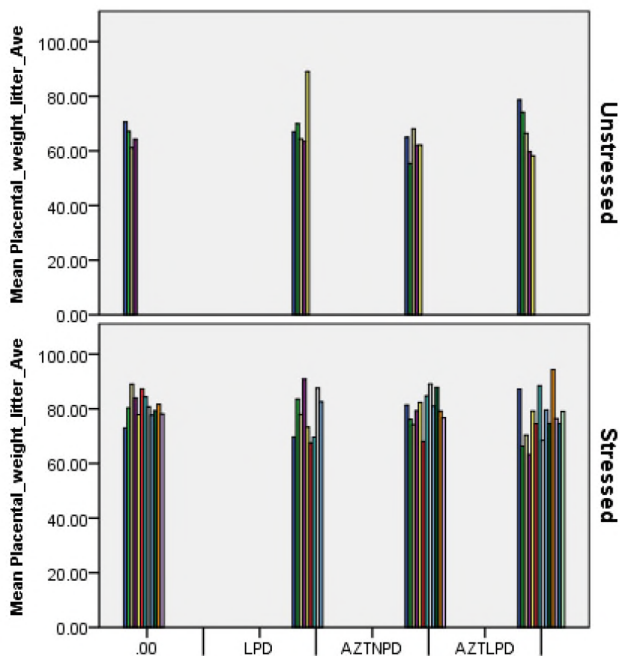

Supplementary Figure 1: Placental weight (mg): each bar represents one litter.

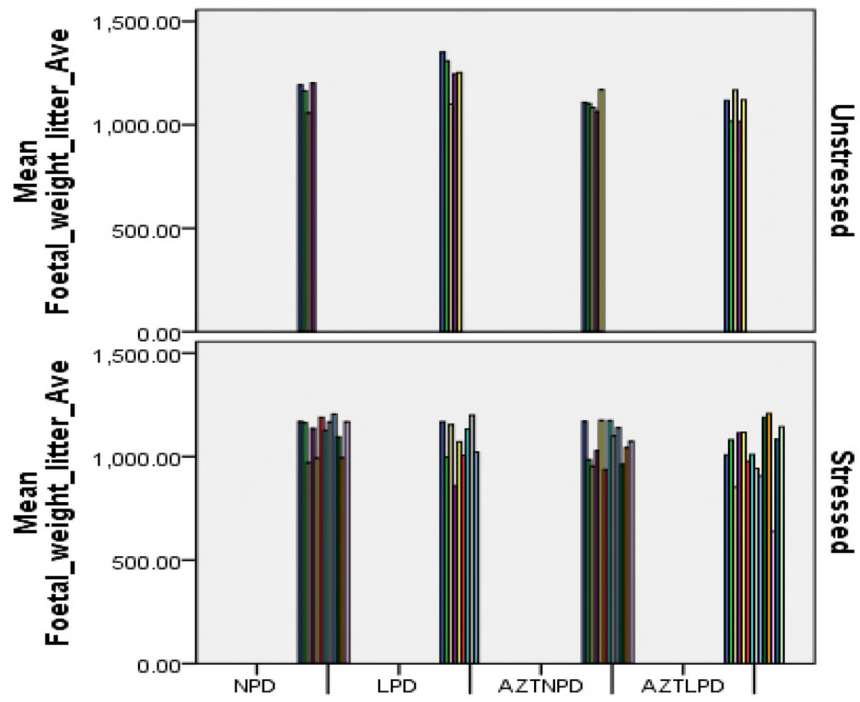

Supplementary Figure 2: Foetal weight (mg): each bar represents one litter.

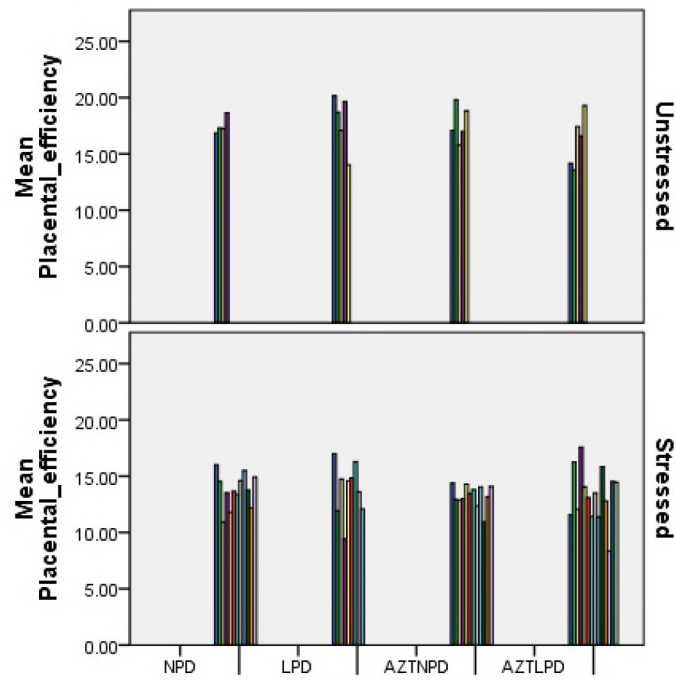

Supplementary Figure 3: Placental Efficiency (foetal weight/embryonic weight): each bar represents one litter.

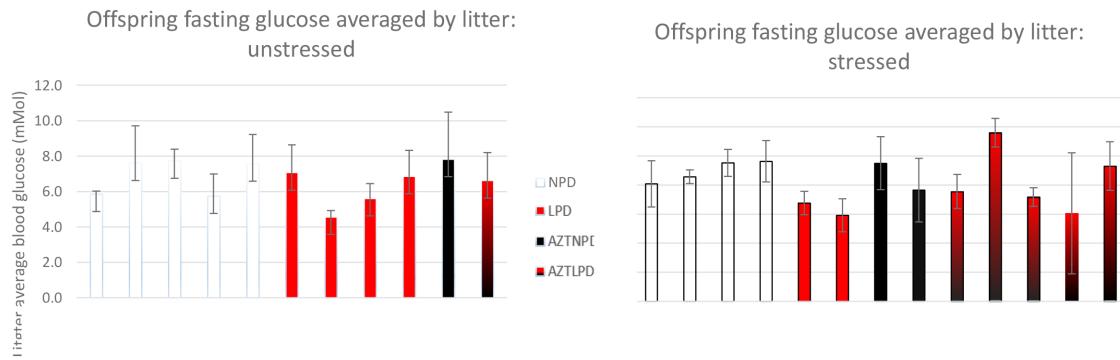

**Supplementary Figure 4: Fasting glucose of offspring (mmol) averaged by litter (error bars 1SD).** NB difference between stressed and unstressed is not significant using litter as the unit, but is significant when using individuals.

**Supplementary Table 1: Data corresponds that that presented in Figure 4**

| Culture conditions | Be Wo   |      |                | MEFs    |      |                |
|--------------------|---------|------|----------------|---------|------|----------------|
|                    | Mean uM | N    | Std. Deviation | Mean uM | N    | Std. Deviation |
| Glucose (baseline) | 3.4     | 1177 | 1.22           | 2.3     | 1390 | 0.24           |
| Low Glucose        | 3.7     | 1641 | 1.11           | 2.5     | 1988 | 0.32           |
| Galactose          | 3.4     | 1796 | 0.98           | 2.3     | 1372 | 0.33           |
| Glucose 5% FCS     | 3.8     | 1691 | 1.14           | 2.5     | 1493 | 0.31           |
| Low Glucose 5% FCS | 3.7     | 1367 | 1.02           | 2.6     | 1384 | 0.33           |
| Glucose - 6mM Glut | 3.6     | 1439 | 1.12           | 2.4     | 2069 | 0.26           |
| No amino acids     | 4.0     | 1297 | 1.35           | 2.7     | 1568 | 0.53           |

Mitochondrial length was in all conditions significantly longer in BeWos than MEFs (all  $p < 0.001$ ). Mitochondria were the same length at baseline (25mM glucose) and in glucose-free galactose media. In all other conditions, mitochondria were significantly longer than baseline (all  $p < 0.001$ ).
